# Supplementary material for: Soluble CD127 potentiates IL‐7 activity in vivo in healthy mice
Source: PubMed Central journal article supplement (PMC8589376; doi:10.1002/iid3.530), 2021-09-15

# Suppl figure 1

## A

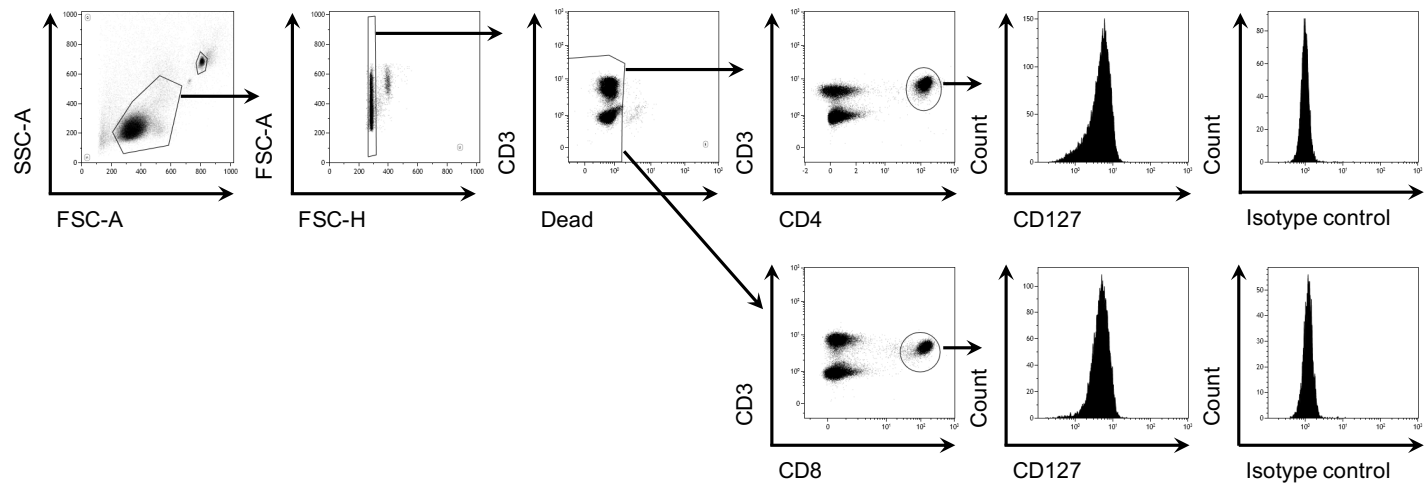

## B

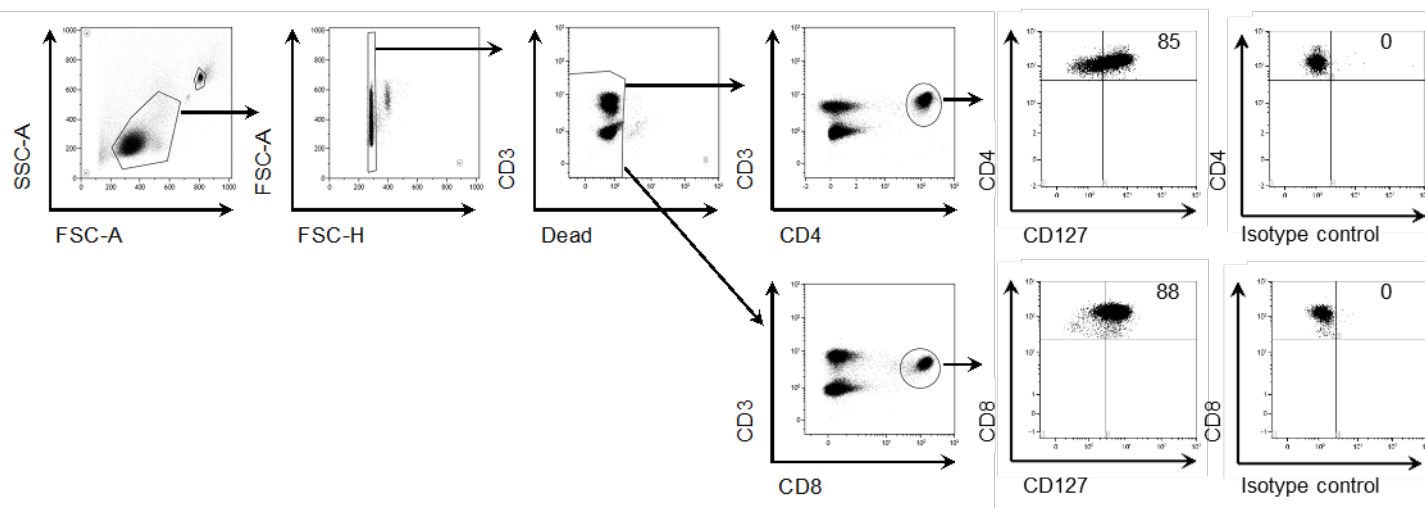

## C

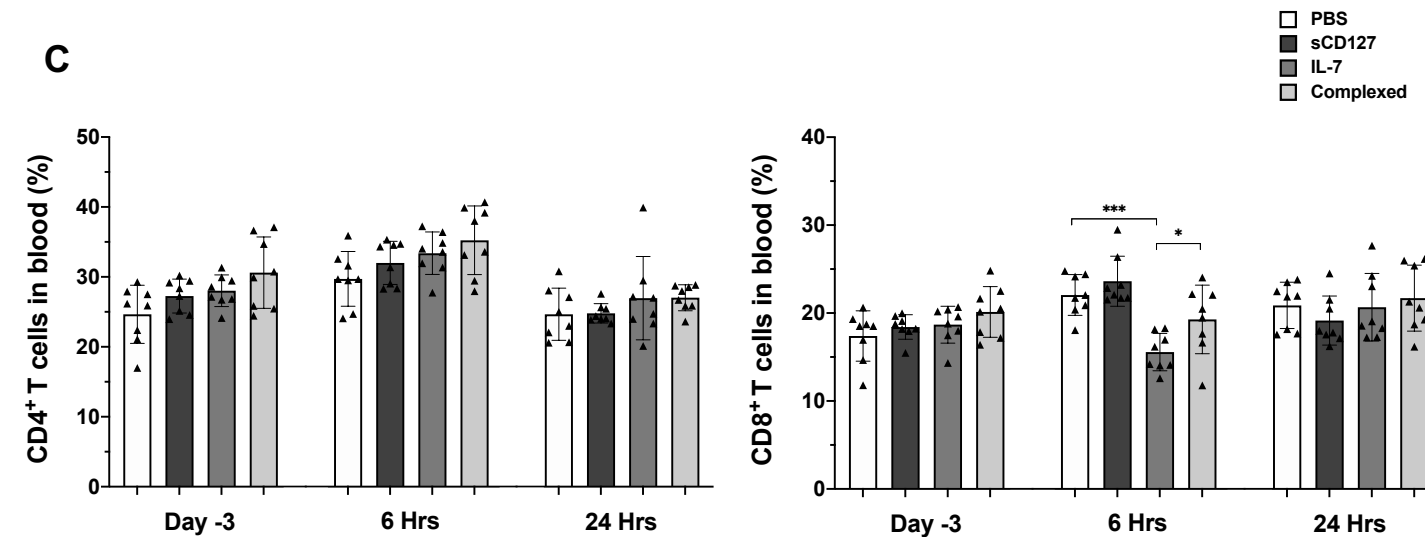

Suppl  
figure 2

**A**

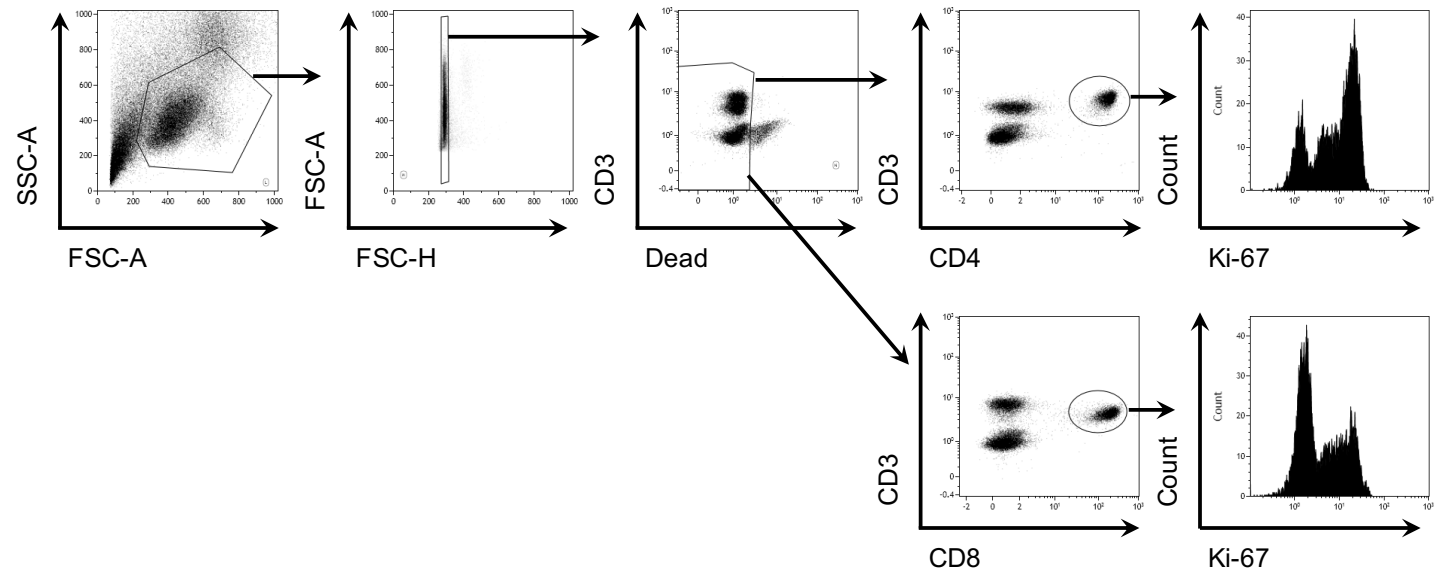

**B**

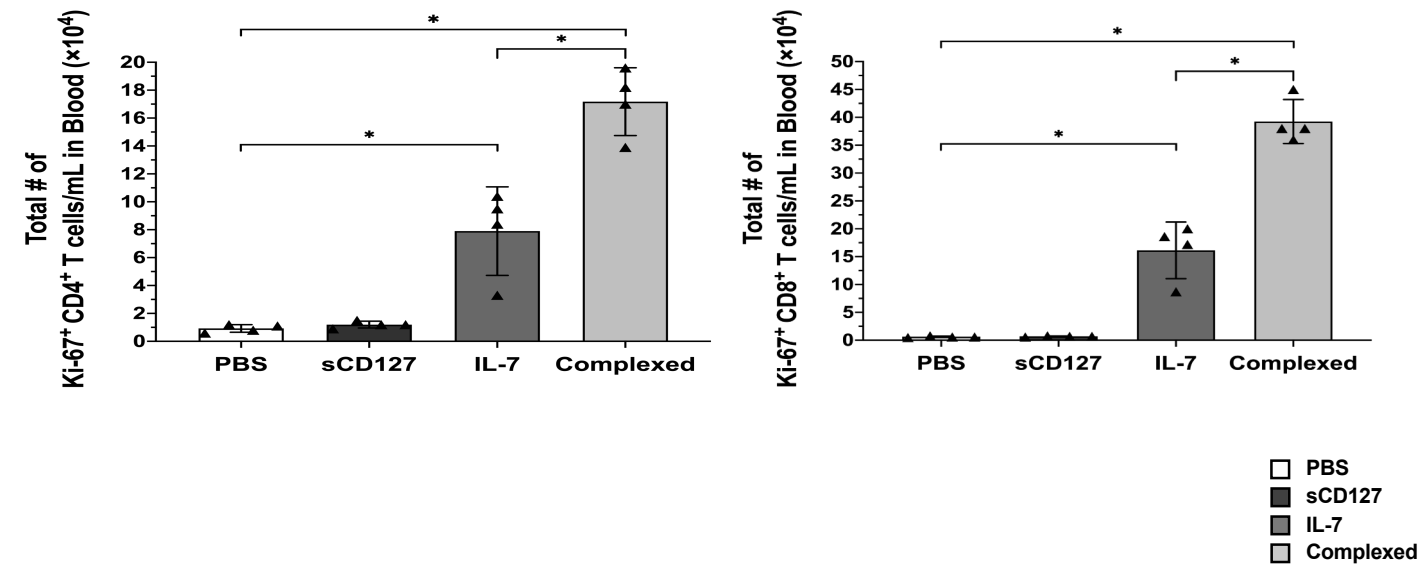

**C**

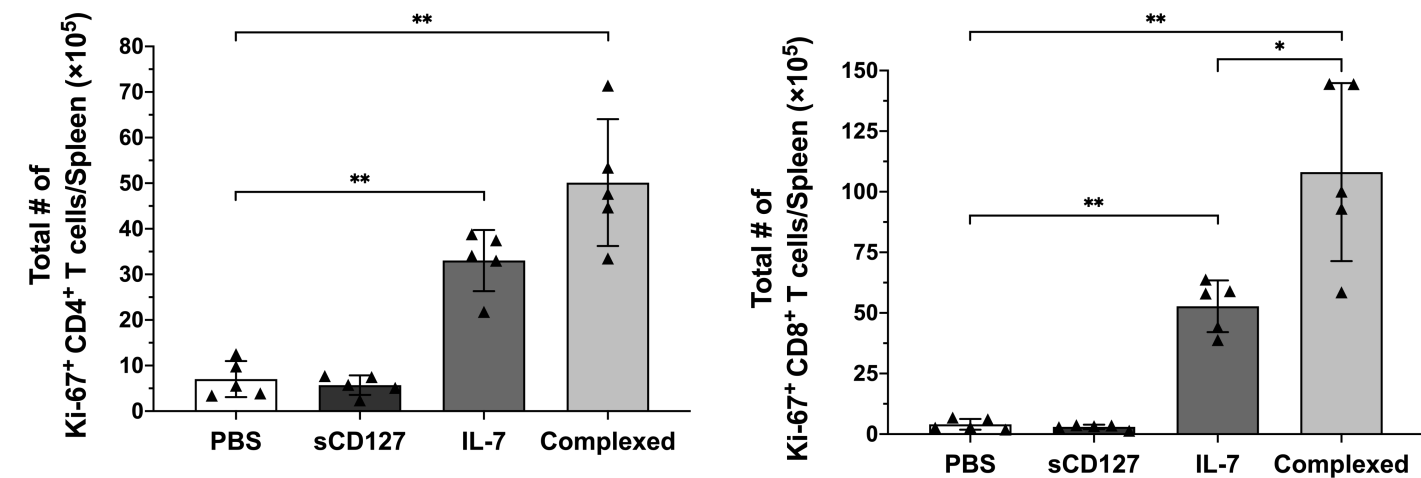

# Suppl figure 3

**A**

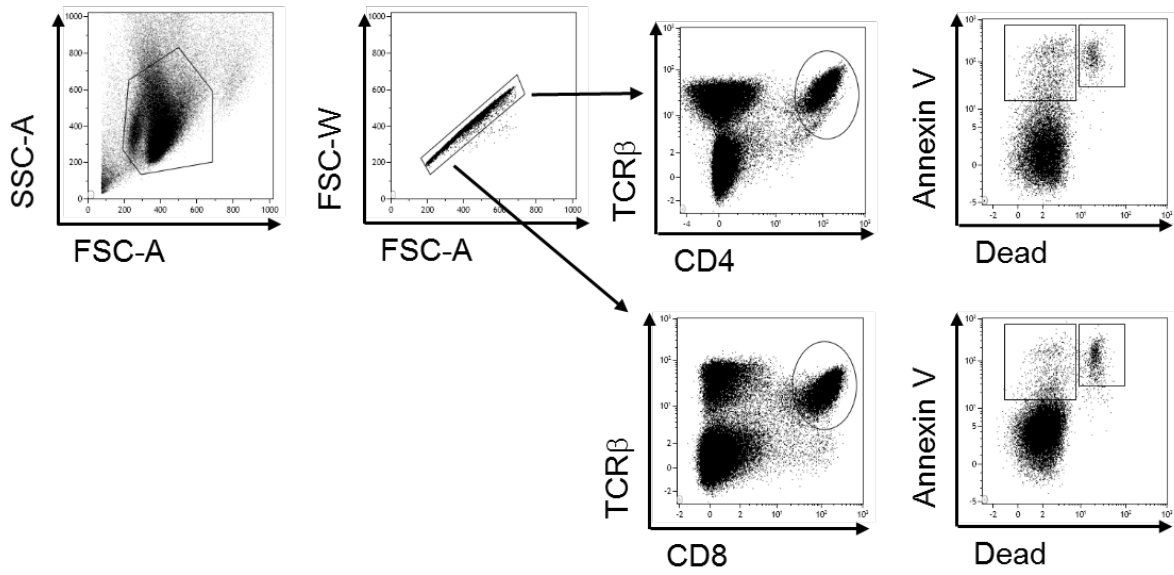

**B**

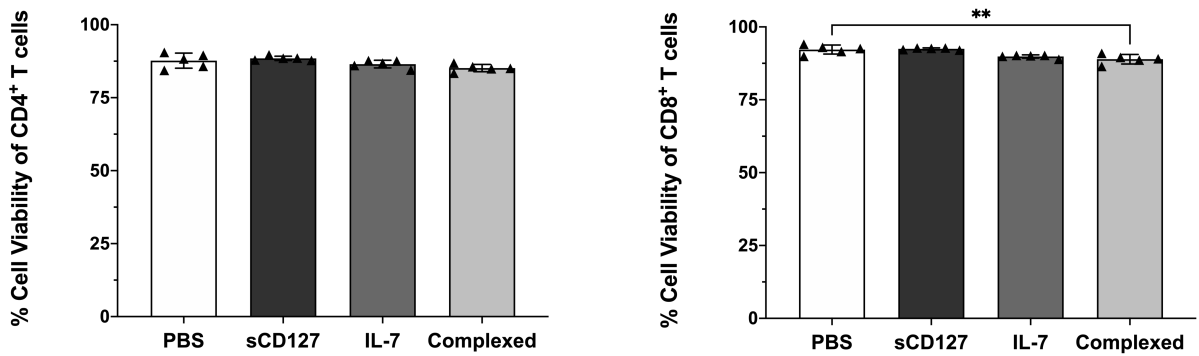

**C**

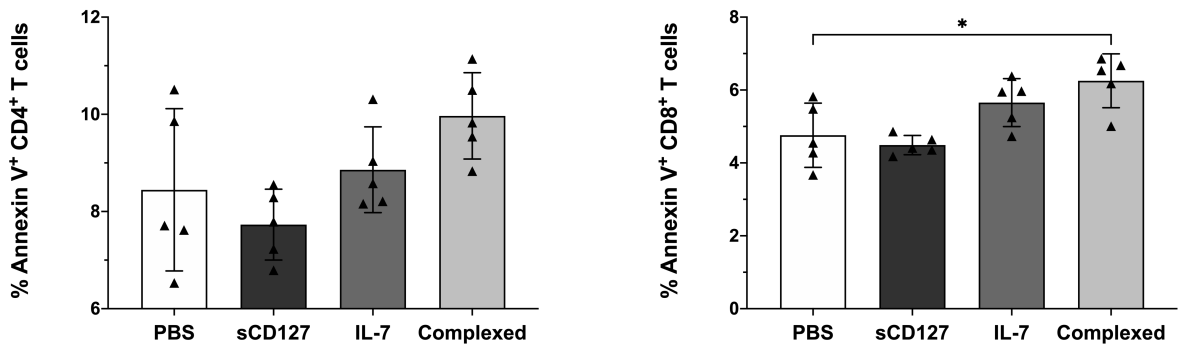

Supplement: IID3-9-1798-s001.pdf [file IID3-9-1798-s001.pdf]
